# Supplementary material for: The thick left ventricular wall of the giraffe heart normalises wall tension, but limits stroke volume and cardiac output
Source: Oxford University Press journal article supplement (doi:10.1242/jeb.132753), 2015-01-01
Supplement: jeb132753supp.pdf [file jeb132753supp.pdf]

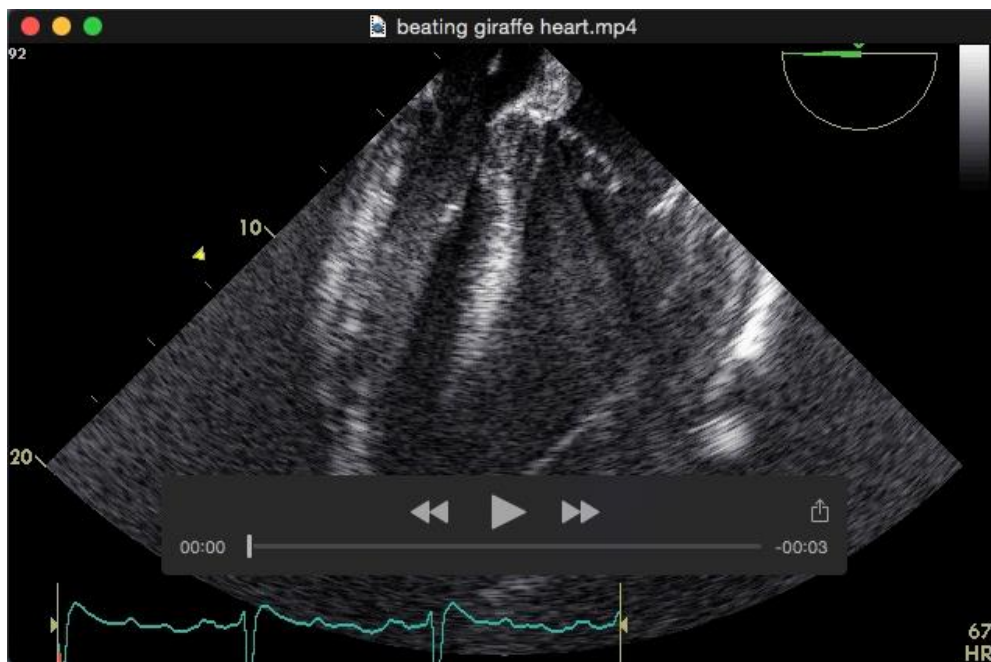

Movie 1. *In vivo* intracardiac echocardiography showing long axis “4-chamber view” of the giraffe heart. The probe is located in the right atrium.
